# Supplementary material
Source: PubMed Central journal article supplement (PMC5669538)
Supplement: jci-127-87406-s001.pdf [file jci-127-87406-s001.pdf]

## **Supplemental Methods**

### ***Drosophila* experiments**

Flies were reared on cornmeal-molasses-yeast agar at 25 °C, 70% humidity, on a 12:12-h light/dark cycle. *ppk-Gal4*, *Egfr* mutants (*Egfr<sup>f24</sup>*, *Egfr<sup>tsla</sup>*), and the UAS-*Egfr* rescue line were obtained from the Bloomington Drosophila Stock Centre (BDSC; Bloomington, IL). *Neuronal Synaptobrevin-GAL4* (*nSyb-Gal4*) was obtained from Julie Simpson (Janelia Farm Research Campus, VA). Wildtype *w<sup>1118</sup>* and *Egfr* short hairpin RNA-interference (RNAi) (transformant ID 107130) flies were obtained from the VDRC (Vienna, Austria).

To assess nociceptive behavior, third instar larvae were transferred to a 100 mm petri dish containing a thin film of distilled water and allowed a 10-min rest period. After this time, they were touched on abdominal segments A4-A6 with a heat probe consisting of a sharpened soldering iron with the tip heated to 46 °C. The response time was recorded as the time elapsed between application of the heat probe and the elicitation of the characteristic nociceptive withdrawal response, a 360° rolling motion about the lateral axis.

Supplemental Figures.

Formalin - EREG vs. NGF

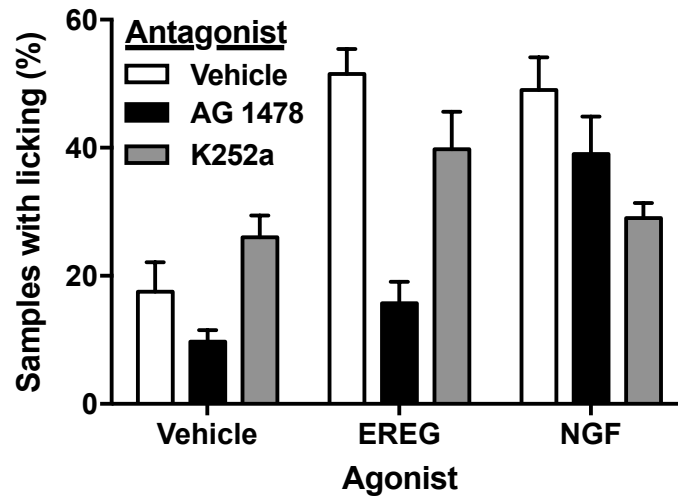

**Supplemental Figure 1.** The EGFR inhibitor AG 1478, but not the Trk blocker, K252a, prevents EREG-induced hypersensitivity on the formalin test. Conversely, K252a, but not AG 1478, blocks NGF-induced hypersensitivity. Agonist x antagonist interaction:  $F_{4,59}=5.4$ ,  $p=0.001$ . Bars represent mean $\pm$ SEM percentage of samples featuring licking/biting behavior;  $n=6-8$ /drug/dose.

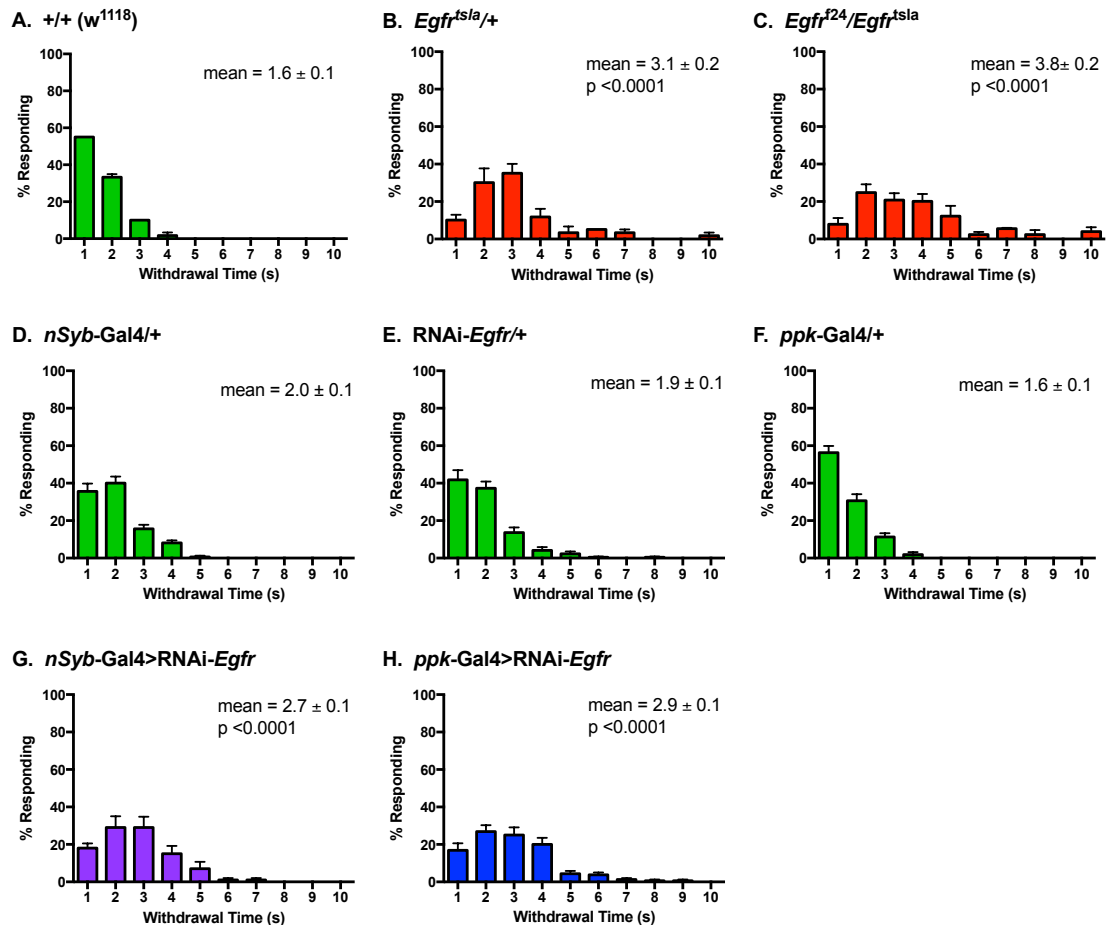

**Supplemental Figure 2. *Egfr* knockdown alters nociceptive responses to noxious thermal stimuli in *Drosophila*.** While homozygous *Egfr* mutations are lethal, heterozygous and trans-heterozygous mutants displayed a strong analgesic phenotype in response to a 46 °C probe (Kruskal-Wallis statistic = 62.6,  $p < 0.0001$ ) (A–C). Using pan-neuronal RNAi knockdown (*nSyb-Gal4*), EGFR was found to be acting in the nervous system (Kruskal-Wallis statistic = 42.0,  $p < 0.0001$ ) (D, E, G), and a requirement for EGFR was further traced down to class IV sensory neurons using *ppk-Gal4* (Kruskal-Wallis statistic = 92.2,  $p < 0.0001$ ) (E, F, H).

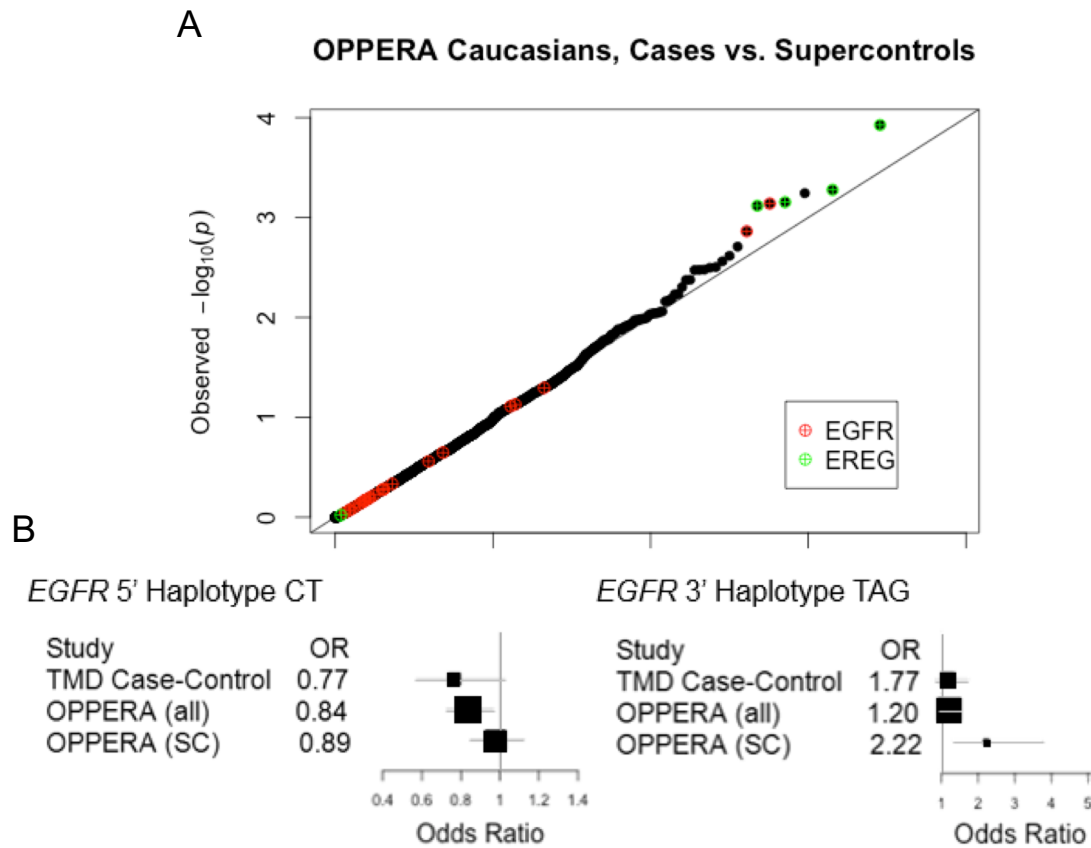

**Supplemental Figure 3.** A) QQ plot of TMD cases vs. supercontrols in OPFERA Caucasians. The SNPs from *EGFR* and *EREG* are labeled in red and green, respectively. B) Association of *EGFR* haplotypes with TMD. Forest plots depicting odds ratios (OR; with 95% confidence intervals) in three human chronic pain cohorts for individual *EGFR* 5' endohaplotypes (left) and 3' endohaplotypes (right) versus all others. The 5' haplotypes consist of SNPs rs759171 and rs4947963; the 3' haplotypes consist of SNPs rs845552, rs2740762, rs1140475. Complete information on haplotype association results is presented in **Supplementary Table 5**; haplotypes with the strongest contribution are presented here.

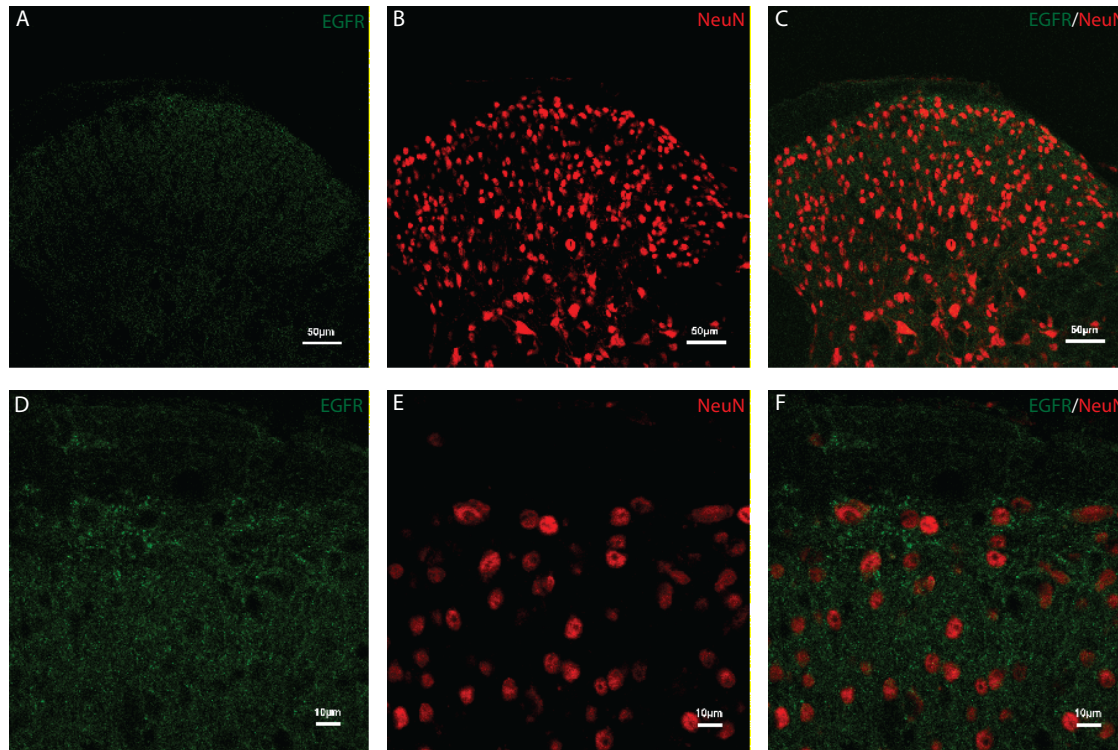

**Supplementary Figure 4.** (A and D) In the superficial dorsal horn of the spinal cord, EGFR-IR (green) was weakly expressed and observed as small dots. The staining for neurons labeled with NeuN (red) is shown in B and E. EGFR did not colocalize with neurons labeled with NeuN (C and F) suggesting that the source of EGFR in the spinal cord is non-neuronal.

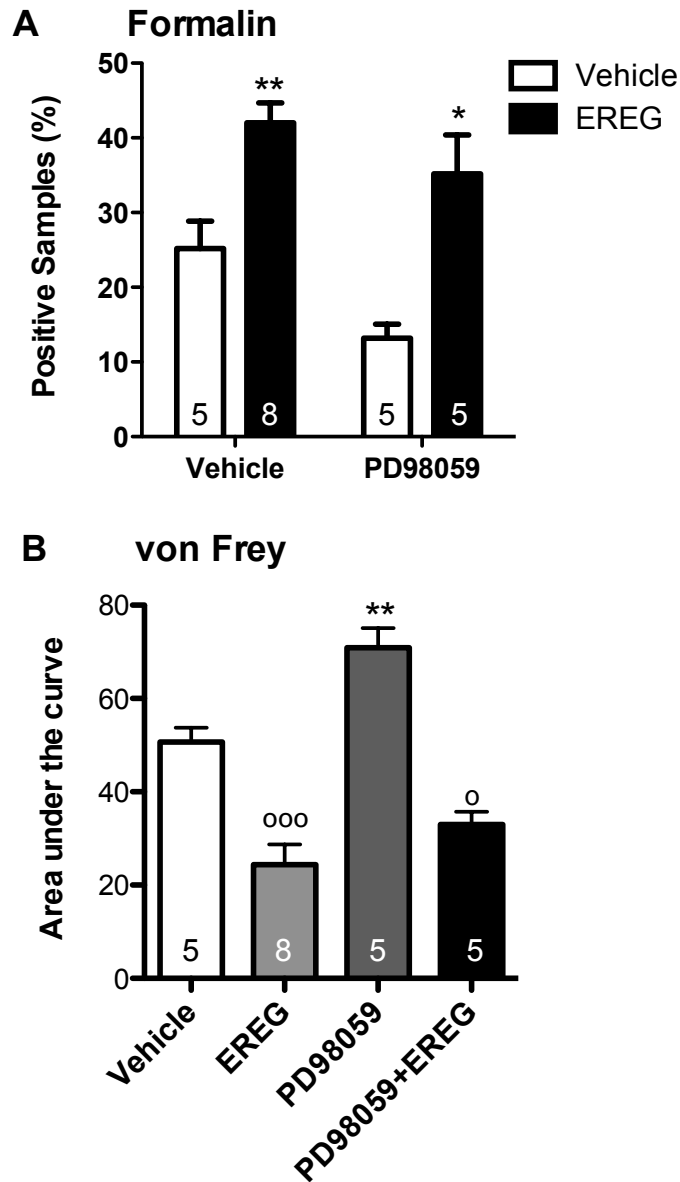

**Supplemental Figure 5.** Inhibition of the ERK pathway produces analgesia, but does not block EREG hypersensitivity. (A) PD98059 (1  $\mu$ g, i.t.), a MEK1/2 inhibitor, produces analgesia but does not block EREG induced hypersensitivity on the late phase of the formalin test (main effect of EREG:  $F_{1,22}=31.6$ ,  $p<0.001$ ; main effect of PD 98056:  $F_{1,22}=11.6$ ,  $p=0.002$ ). Bars represent mean  $\pm$  SEM percentage of samples featuring licking/biting behavior. (B) PD98059 does not block EREG induced hypersensitivity on the von Frey test, but is slightly analgesic ( $F_{3,18}=31.8$ ,  $p<0.001$ ). Bars represent mean  $\pm$  SEM area under the curve over the 60-min testing period for von Frey mechanical testing (at 0, 15, 30 and 60 min post-injection). Sample sizes are provided on graphs. \* $p<0.05$ , \*\* $p<0.01$  increase compared to vehicle group. ° $p<0.05$ , °°° $p<0.001$  decrease compared to vehicle group.

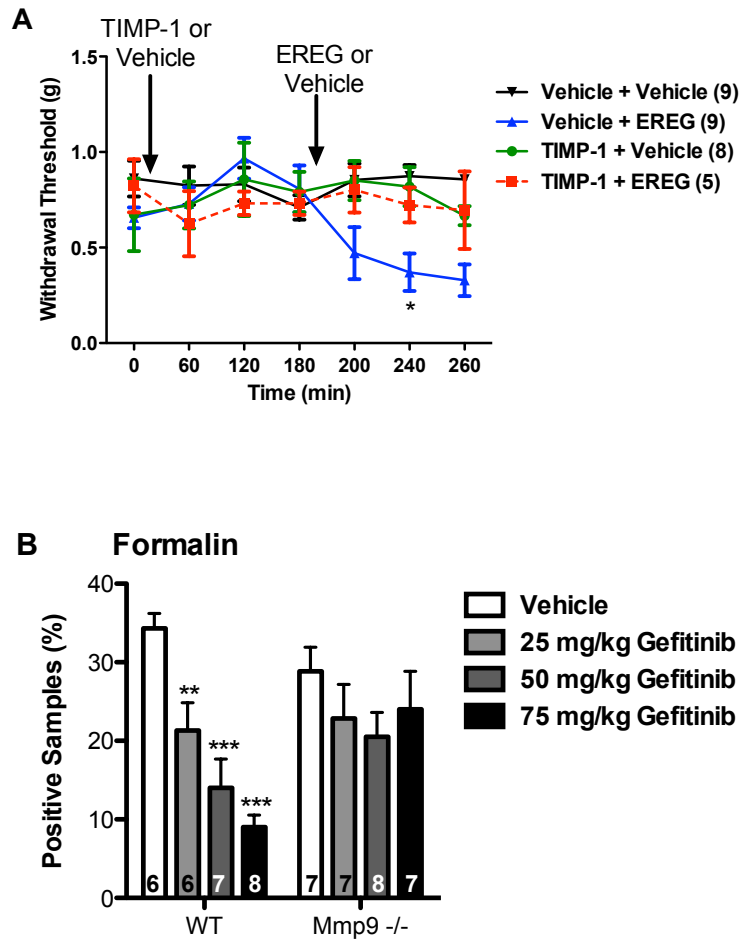

**Supplementary Figure 6.** MMP-9 inhibition blocks EREG hypersensitivity, and *Mmp9* null mutant mice are less sensitive to the analgesic properties of gefitinib on the formalin test. **(A)** Pretreatment with TIMP-1 (4 pmol, i.t.), an endogenous inhibitor of MMP-9 prevents EREG-induced mechanical allodynia on the von Frey test (TIMP-1 x EREG x repeated measures interaction:  $F_{6,162}=2.6$ ,  $p=0.02$ ) without affecting mechanical sensitivity *per se*. Symbols represent mean  $\pm$  SEM withdrawal threshold (g). **(B)** EGFR antagonist gefitinib produces dose-dependent analgesia in wildtype (*Mmp9*<sup>+/+</sup>) but not *Mmp9* null mutant (*Mmp9*<sup>-/-</sup>) mice (genotype x dose:  $F_{3,48}=3.2$ ,  $p=0.03$ ). Bars represent mean  $\pm$  SEM percentage of samples featuring licking/biting behavior. Sample sizes are presented on graphs. \* $p<0.05$ , \*\* $p<0.01$ , \*\*\* $p<0.001$  compared with vehicle group using posthoc test for repeated measures **(A)** or Dunnett's case-comparison posthoc test **(B)**.

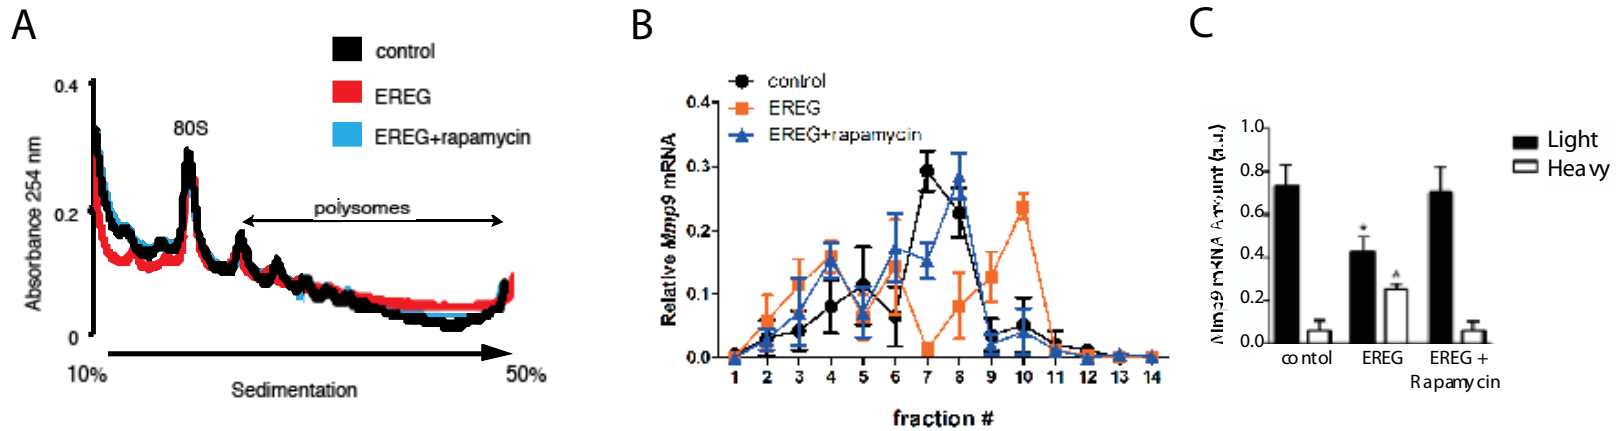

**Supplementary Figure 7.** EREG stimulates *MMP-9* mRNA translation in an mTOR-dependent manner. **(A)** Polysome profiling of DRG lysates treated with vehicle, EREG (10 ng, i.t.) or EREG+rapamycin. Rapamycin (10mg/kg) was injected 20 min before EREG, and the lumbar DRG and spinal cord tissue were harvested 40 min after EREG injection. **(B)** Distribution of *Mmp9* mRNAs across sucrose gradient fractions prepared from DRG lysates ( $n=3$ , technical replicates). Fractions 5-14 are polysome fractions. **(C)** The relative amount of *Mmp9* mRNA in the light (5-9) and heavy (10-14) polysome fractions is quantified ( $*p<0.05$  compared to analogous control condition). *Mmp9* mRNA co-sediments with heavier polysome fractions in EREG-treated DRG lysates, indicating increased rates of translation, and this effect is blocked by rapamycin.



## Supplemental Tables.

**Supplemental Table 1.** Half-maximal analgesic doses ( $AD_{50}$ s) and 95% confidence intervals (95% CI) for EGFR inhibitor reversal of pain behavior on the late-phase of the formalin test. Morphine is presented for comparison purposes.

| <b>Drug</b> | <b><math>AD_{50}</math> (mg/kg)</b> | <b>95% CI (mg/kg)</b> |
|-------------|-------------------------------------|-----------------------|
| AG 1478     | 5.1                                 | 2.3-12.1              |
| Gefitinib   | 14.1                                | 8.3-24.2              |
| Lapatinib   | 61                                  | 29.6-125              |
| Morphine    | 4.0                                 | 1.9-8.5               |

**Supplemental Table 2.** Half-maximal analgesic doses (AD<sub>50</sub>s) and 95% confidence intervals (95% CI) for EGFR inhibitor reversal of mechanical hypersensitivity after CFA (day 3 post-injection) and SNI (day 7 post-surgery). Doses are reported in mg/kg.

| <b>Drug</b> | <b>CFA</b>             |               | <b>SNI</b>             |               |
|-------------|------------------------|---------------|------------------------|---------------|
|             | <b>AD<sub>50</sub></b> | <b>95% CI</b> | <b>AD<sub>50</sub></b> | <b>95% CI</b> |
| AG 1478     | 24                     | 14-43         | 77                     | 47-129        |
| Gefitinib   | 37                     | 18-78         | 195                    | 40-1000       |
| Lapatinib   | 55                     | 34-88         | 111                    | 57-217        |

**Supplemental Table 3.** Demographic characteristics of four human pain cohorts.

|                       | OP-All     |            | OP-SC      |            | TMD         |             | pre-OP     |
|-----------------------|------------|------------|------------|------------|-------------|-------------|------------|
|                       | cases      | controls   | cases      | S-controls | cases       | controls    | cohort     |
| <b>N</b>              | 166        | 1442       | 129        | 231        | 200         | 198         | 186        |
| <b>Female</b>         | 83.1%      | 56.0%      | 100%       | 100%       | 100%        | 100%        | 100%       |
| <b>White</b>          | 78.3%      | 52.6%      | 100%       | 100%       | 100%        | 100%        | 100%       |
| <b>Black</b>          | 12.7%      | 29.7%      |            |            |             |             |            |
| <b>Other/Refused</b>  | 9.0%       | 17.7%      |            |            |             |             |            |
| <b>Age (Mean, SD)</b> | 29.0 (8.0) | 27.0 (7.7) | 28.5 (8.0) | 25.6 (6.7) | 36.8 (12.2) | 29.9 (11.0) | 22.8 (4.7) |

Abbreviations: OP-All: OPPERA study, all subjects; OP-SC: OPPERA study, “super-controls”; TMD: TMD case-control cohort; pre-OP: pre-OPPERA cohort. See **Online Methods** section for details.

**Supplementary Table 4.** Top-ranking *p*-values of cellular pathways associated with TMD in discovery cohort OPPERA cases vs. “supercontrols”.

| <b>Index</b> | <b>Pathway</b>                                   | <b>p-value</b> |
|--------------|--------------------------------------------------|----------------|
| 182          | EGFR -> AP-1/ATF2 signaling                      | 0.0013         |
| 188          | EGFR/ERBB2 -> TP53 signaling                     | 0.0042         |
| 175          | GFR -> AP-1/CREB/CREBBP/ELK-SRF/MYC signaling    | 0.0052         |
| 179          | EGFR -> CTNND signaling                          | 0.0074         |
| 187          | EGFR -> ZNF259 signaling                         | 0.0074         |
| 183          | EGFR/ERBB2 -> CTNNB signaling                    | 0.0094         |
| 18           | Adherens Junction Regulat on                     | 0.0100         |
| 216          | TGFBR -> AP-1 signaling                          | 0.0103         |
| 82           | ThrombinR -> AP-1/CREB/ELK-SRF/SP1 signaling     | 0.0110         |
| 109          | VasopressinR1 -> CREB/ELK-SRF/AP-1/EGR signaling | 0.0110         |
| 17           | Focal Adhesion Regulation                        | 0.0129         |
| 103          | AdenosineR -> AP-1 signaling                     | 0.0136         |
| 145          | FibronectinR -> AP-1/ELK-SRF/SREBF signaling     | 0.0142         |
| 95           | DopamineR2 -> AP-1/CREB/ELK-SRF signaling        | 0.0173         |
| 116          | NeurotensinR -> ELK-SRF/AP-1/EGR signaling       | 0.0190         |
| 180          | EGFR -> SMAD1 signaling                          | 0.0197         |
| 185          | EGFR/ERBB2 -> HIF1A signaling                    | 0.0226         |
| 136          | VasopressinR2 -> CREB/ELK-SRF/AP-1/EGR signaling | 0.0234         |
| 10           | Gonadotrope Cell Activat on                      | 0.0259         |
| 128          | EndothelineRa -> AP-1/CREB signaling             | 0.0335         |
| 151          | ICAM1 -> AP-1/CREB/ELK-SRF signaling             | 0.0335         |
| 218          | TGFBR -> ATF/GADD/MAX/TP53 signaling             | 0.0378         |
| 220          | TGFBR -> MEF/MYOD/MYOG signaling                 | 0.0378         |
| 177          | GFR -> FOXO3A signaling                          | 0.0401         |
| 178          | GFR -> NCOR2 signaling                           | 0.0402         |
| 245          | TLR -> AP-1 signaling                            | 0.0430         |
| 225          | NGFR -> AP-1/CEBPB/CREB/ELK-SRF/TP53 signaling   | 0.0431         |
| 210          | T-cell receptor -> AP-1 signaling                | 0.0447         |
| 238          | EctodysplasinR -> AP-1 signaling                 | 0.0447         |
| 198          | VEGFR -> ATF/CREB/ELK-SRF signaling              | 0.0453         |
| 86           | CCR5 -> TP53 signaling                           | 0.0489         |
| 156          | Notch -> TCF3 signaling                          | 0.0490         |
| 191          | FGFR-> RUNX2 signaling                           | 0.0492         |
| 205          | IGF1R -> MEF/MYOD/MYOG signaling                 | 0.0506         |
| 235          | TNFRSF1A -> AP-1/ATF/TP53 signaling              | 0.0539         |
| 236          | TNFR -> AP-1/ATF/TP53 signaling                  | 0.0539         |
| 203          | IGF1R -> CEBPA/FOXO1A signaling                  | 0.0563         |

| SNPs                         | Association Analysis |      |           |          |      |      |       |    | Logistic Regression |      |       |       |        |           |       |       |
|------------------------------|----------------------|------|-----------|----------|------|------|-------|----|---------------------|------|-------|-------|--------|-----------|-------|-------|
|                              | NSNP                 | NHAP | HAPLOTYPE | HAP_FREQ | F_A  | F_U  | CHISQ | DF | P_CHISQ             | OR   | STAT  | P_LOG | LOG_OR | SE_LOG_OR | LB_OR | UB_OR |
| rs759171 rs4947963           | 2                    | 3    | OMNIBUS   | NA       | NA   | NA   | 6.54  | 2  | 0.04                | NA   | 6.92  | 0.03  |        |           |       |       |
| rs759171 rs4947963           | 2                    | 3    | CC        | 0.35     | 0.35 | 0.35 | 0.01  | 1  | 0.92                | 1.01 | 0.01  | 0.93  | 0.01   | 0.12      | 0.80  | 1.27  |
| rs759171 rs4947963           | 2                    | 3    | AT        | 0.13     | 0.16 | 0.10 | 5.86  | 1  | 0.02                | 1.71 | 5.92  | 0.02  | 0.54   | 0.22      | 1.11  | 2.63  |
| rs759171 rs4947963           | 2                    | 3    | CT        | 0.52     | 0.49 | 0.55 | 3.00  | 1  | 0.08                | 0.77 | 3.24  | 0.07  | -0.27  | 0.15      | 0.57  | 1.02  |
| rs1140475 rs2740762 rs845552 | 3                    | 4    | OMNIBUS   | NA       | NA   | NA   | 2.47  | 3  | 0.48                | NA   | 2.18  | 0.54  |        |           |       |       |
| rs1140475 rs2740762 rs845552 | 3                    | 4    | TAG       | 0.13     | 0.14 | 0.13 | 0.57  | 1  | 0.45                | 1.17 | 0.61  | 0.44  | 0.16   | 0.20      | 0.79  | 1.74  |
| rs1140475 rs2740762 rs845552 | 3                    | 4    | CAG       | 0.03     | 0.04 | 0.03 | 0.43  | 1  | 0.51                | 1.34 | 0.50  | 0.48  | 0.29   | 0.41      | 0.59  | 3.02  |
| rs1140475 rs2740762 rs845552 | 3                    | 4    | CCG       | 0.32     | 0.30 | 0.35 | 2.06  | 1  | 0.15                | 0.81 | 1.87  | 0.17  | -0.21  | 0.15      | 0.60  | 1.10  |
| rs1140475 rs2740762 rs845552 | 3                    | 4    | CCA       | 0.50     | 0.51 | 0.49 | 0.35  | 1  | 0.55                | 1.11 | 0.50  | 0.48  | 0.10   | 0.15      | 0.83  | 1.48  |
| rs759171 rs4947963           | 2                    | 3    | OMNIBUS   | NA       | NA   | NA   | 6.45  | 2  | 0.04                | NA   | 6.37  | 0.04  |        |           |       |       |
| rs759171 rs4947963           | 2                    | 3    | CC        | 0.33     | 0.35 | 0.32 | 2.08  | 1  | 0.15                | 1.11 | 1.88  | 0.17  | 0.10   | 0.08      | 0.96  | 1.29  |
| rs759171 rs4947963           | 2                    | 3    | AT        | 0.14     | 0.14 | 0.12 | 2.57  | 1  | 0.11                | 1.18 | 2.37  | 0.12  | 0.17   | 0.11      | 0.96  | 1.46  |
| rs759171 rs4947963           | 2                    | 3    | CT        | 0.53     | 0.51 | 0.55 | 6.06  | 1  | 0.01                | 0.84 | 5.96  | 0.01  | -0.18  | 0.07      | 0.73  | 0.97  |
| rs1140475 rs2740762 rs845552 | 3                    | 5    | OMNIBUS   | NA       | NA   | NA   | 10.32 | 4  | 0.04                | NA   | 11.40 | 0.02  |        |           |       |       |
| rs1140475 rs2740762 rs845552 | 3                    | 5    | TAG       | 0.11     | 0.11 | 0.10 | 2.12  | 1  | 0.15                | 1.20 | 2.44  | 0.12  | 0.18   | 0.12      | 0.95  | 1.51  |
| rs1140475 rs2740762 rs845552 | 3                    | 5    | CAG       | 0.04     | 0.03 | 0.05 | 8.26  | 1  | 0.00                | 0.54 | 9.54  | 0.00  | -0.62  | 0.20      | 0.37  | 0.80  |
| rs1140475 rs2740762 rs845552 | 3                    | 5    | CCG       | 0.34     | 0.34 | 0.33 | 0.41  | 1  | 0.52                | 1.06 | 0.56  | 0.46  | 0.06   | 0.08      | 0.91  | 1.23  |
| rs1140475 rs2740762 rs845552 | 3                    | 5    | CAA       | 0.02     | 0.01 | 0.02 | 0.20  | 1  | 0.65                | 0.81 | 0.38  | 0.54  | -0.21  | 0.35      | 0.41  | 1.60  |
| rs1140475 rs2740762 rs845552 | 3                    | 5    | CCA       | 0.49     | 0.50 | 0.50 | 0.07  | 1  | 0.79                | 0.98 | 0.10  | 0.76  | -0.02  | 0.07      | 0.85  | 1.13  |
| rs759171 rs4947963           | 2                    | 3    | OMNIBUS   | NA       | NA   | NA   | 1.05  | 2  | 0.59                | NA   | 1.60  | 0.45  |        |           |       |       |
| rs759171 rs4947963           | 2                    | 3    | CC        | 0.34     | 0.40 | 0.36 | 0.92  | 1  | 0.34                | 1.22 | 1.48  | 0.22  | 0.20   | 0.16      | 0.89  | 1.68  |
| rs759171 rs4947963           | 2                    | 3    | AT        | 0.14     | 0.12 | 0.14 | 0.40  | 1  | 0.53                | 0.83 | 0.55  | 0.46  | -0.19  | 0.25      | 0.51  | 1.36  |
| rs759171 rs4947963           | 2                    | 3    | CT        | 0.51     | 0.48 | 0.50 | 0.25  | 1  | 0.62                | 0.89 | 0.52  | 0.47  | -0.12  | 0.16      | 0.65  | 1.22  |
| rs1140475 rs2740762 rs845552 | 3                    | 5    | OMNIBUS   | NA       | NA   | NA   | 6.86  | 4  | 0.14                | NA   | 13.00 | 0.01  |        |           |       |       |
| rs1140475 rs2740762 rs845552 | 3                    | 5    | TAG       | 0.11     | 0.15 | 0.09 | 5.80  | 1  | 0.02                | 2.22 | 9.00  | 0.00  | 0.80   | 0.27      | 1.32  | 3.74  |
| rs1140475 rs2740762 rs845552 | 3                    | 5    | CAG       | 0.03     | 0.03 | 0.02 | 0.22  | 1  | 0.64                | 1.82 | 1.09  | 0.30  | 0.60   | 0.57      | 0.59  | 5.60  |
| rs1140475 rs2740762 rs845552 | 3                    | 5    | CCG       | 0.34     | 0.36 | 0.37 | 0.13  | 1  | 0.72                | 0.95 | 0.08  | 0.78  | -0.05  | 0.18      | 0.67  | 1.34  |
| rs1140475 rs2740762 rs845552 | 3                    | 5    | CAA       | 0.02     | 0.02 | 0.01 | 0.31  | 1  | 0.58                | 1.86 | 0.62  | 0.43  | 0.62   | 0.79      | 0.40  | 8.70  |
| rs1140475 rs2740762 rs845552 | 3                    | 5    | CCA       | 0.49     | 0.44 | 0.50 | 2.15  | 1  | 0.14                | 0.66 | 5.70  | 0.02  | -0.42  | 0.17      | 0.47  | 0.93  |

**Supplementary Table 5.** Green cases = **TMD Case-Control Cohort** (200 cases, 198 controls), black cases = **OPPERA Caucasians, Cases vs. Controls** (127 cases, 731 controls), red cases = **OPPERA Caucasians, Cases vs. Supercontrols** (127 cases, 231 supercontrols). Association analysis for black and red cases did not control for other covariates and logistic regression controlled for sex and site. **Abbreviations:** HAP\_FREQ=overall frequency of haplotype (F from logistic regression output), F\_A=frequency in affected (TMD cases), F\_U=frequency in unaffected (TMD controls/supercontrols).
